# Supplementary material for: Insights into ClpXP proteolysis: heterooligomerization and partial deactivation enhance chaperone affinity and substrate turnover in Listeria monocytogenes
Source: Royal Society of Chemistry journal article supplement (doi:10.1039/c6sc03438a), 2016-10-28
Supplement: c6sc03438a1.pdf [file c6sc03438a1.pdf]

**Insights into ClpXP proteolysis: Heterooligomerization and partial deactivation enhance chaperone affinity and substrate turnover in *Listeria monocytogenes***

*Dóra Balogh<sup>1,3</sup>, Maria Dahmen<sup>1,3</sup>, Matthias Stahl<sup>1</sup>, Marcin Poreba<sup>2</sup>, Malte Gersch<sup>1,4</sup>, Marcin Drag<sup>2</sup> and Stephan A. Sieber<sup>\*,1</sup>*

<sup>1</sup> Center for Integrated Protein Science at the Department of Chemistry, Technische Universität München, Lichtenbergstrasse 4, Garching, D-85747, Germany.

<sup>2</sup> Department of Bioorganic Chemistry, Faculty of Chemistry, Wrocław University of Technology, Wybrzeże Wyspiańskiego 27, 50-370 Wrocław, Poland.

<sup>3</sup> D.B. and M.D. contributed equally to this study.

<sup>4</sup> Present address: Medical Research Council Laboratory of Molecular Biology, Francis Crick Avenue, Cambridge, CB2 0QH, UK

\* Corresponding author: S.A.S., stephan.sieber@mytum.de

**Supporting Information**

|                                   |     |
|-----------------------------------|-----|
| 1. Supplementary Figures.....     | S2  |
| 2. Supplementary Tables.....      | S5  |
| 3. Biochemical Procedures .....   | S11 |
| 4. Chemical Synthesis .....       | S15 |
| 5. HPLC Chromatograms.....        | S17 |
| 6. MS Spectra.....                | S18 |
| 7. Supplementary References ..... | S22 |

## 1. Supplementary Figures

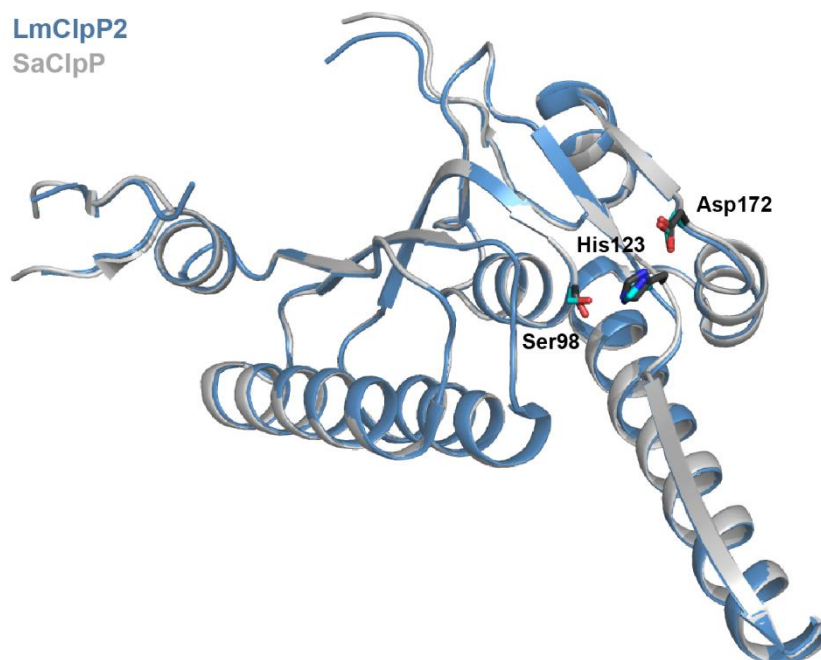

**Fig. S1** Structural superposition of LmClpP2 from LmClpP1/2 heterocomplex (PDB code 4RYF, blue) and SaClpP (PDB code 3V5E, gray). Residues of the catalytic triad are shown in cyan for LmClpP2 and dark gray for SaClpP, heteroatoms O and N are shown in red and blue, respectively. The figure was made with PyMOL 1.3.<sup>1</sup>

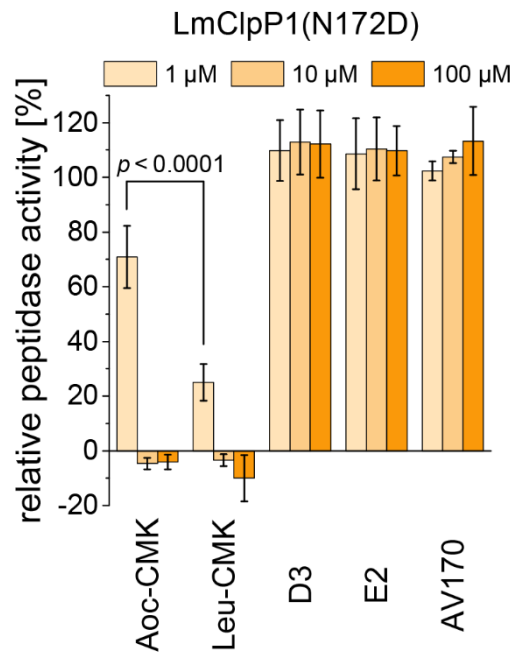

**Fig. S2** Peptidase assay (1  $\mu\text{M}$  LmClpP1(N172D) and 200  $\mu\text{M}$  Ac-Ala-hArg-Leu-ACC substrate). Three different inhibitor concentrations were tested. Data are normalized to DMSO control as 100%. The dataset represents two independent experiments which were measured in triplicate (mean  $\pm$  sd).  $p$ -value was determined by Student's  $t$ -test.

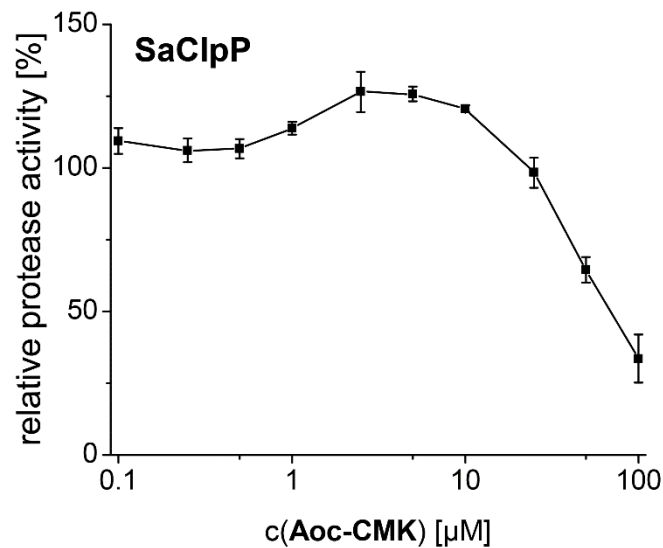

**Fig. S3** Protease activity of SaClpP with **Aoc-CMK** (0.2  $\mu\text{M}$  SaClpP<sub>14</sub>, 0.4  $\mu\text{M}$  SaClpX<sub>6</sub> and 0.4  $\mu\text{M}$  eGFP-SsrA). Data represent two independent experiments which were measured in triplicate (mean  $\pm$  sd).

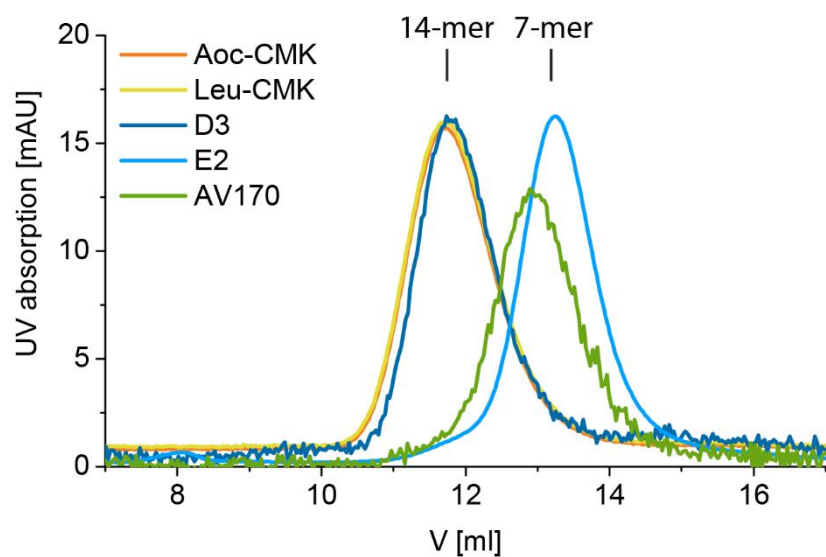

**Fig. S4** Size-exclusion chromatograms of LmClpP2 treated with inhibitors. Treatment with **Aoc-CMK**, **Leu-CMK** and **D3** results in retention of the tetradecamer whereas **E2** and **AV170** induce de-oligomerization to heptamers.

## 2. Supplementary Tables

**Table S1** Names and abbreviations of non-natural amino acids used in the peptidase substrate library screening.

| Abbreviation              | Name                                             |
|---------------------------|--------------------------------------------------|
| D-Ala                     | D-alanine                                        |
| D-Leu                     | D-leucine                                        |
| D-Asp                     | D-aspartic acid                                  |
| D-Arg                     | D-arginine                                       |
| D-Phe                     | D-phenylalanine                                  |
| Cit                       | citrulline                                       |
| Orn                       | ornithine                                        |
| hArg                      | homoarginine                                     |
| Glu(O-Bzl)                | glutamic acid 4-benzyl ester                     |
| Asp(O-Bzl)                | aspartic acid 4-benzyl ester                     |
| hPhe                      | homophenylalanine                                |
| Cha                       | cyclohexylalanine                                |
| Thr(O-Bzl)                | O-benzylthreonine                                |
| Phe(3,4-Cl <sub>2</sub> ) | 3,4-dichlorophenylalanine                        |
| Pip                       | piperidine-2-carboxylic acid                     |
| Abu                       | 2-aminobutanoic acid                             |
| nVal                      | norvaline                                        |
| Met(O <sub>2</sub> )      | methionine sulfone                               |
| Dap                       | 2,3-diaminopropionic acid                        |
| Dab                       | 2,4-diaminobutyric acid                          |
| Phe(F <sub>5</sub> )      | pentafluorophenylalanine                         |
| Bpa                       | p-benzoylphenylalanine                           |
| hLeu                      | homoleucine                                      |
| nLeu                      | norleucine                                       |
| Tic                       | 1,2,3,4-tetrahydroisoquinoline-3-carboxylic acid |
| Igl                       | 2-indanylglycine                                 |
| 2-Aoc                     | 2-aminooctanoic acid                             |
| hSer                      | homoserine                                       |
| Chg                       | cyclohexylglycine                                |
| dhLeu                     | dehydroleucine                                   |
| Tle                       | tert-leucine                                     |
| Arg(NO <sub>2</sub> )     | N <sub>ω</sub> -nitroarginine                    |
| Glu(O-Me)                 | glutamic acid γ-methyl ester                     |
| Asp(O-Me)                 | aspartic acid γ-methyl ester                     |
| Phe(4-Cl)                 | p-chlorophenylalanine                            |
| 4-Pal                     | 4-pyridylalanine                                 |
| Ser(O-Bzl)                | O-benzylserine                                   |
| His(N-Bzl)                | N(im)-benzylhistidine                            |
| Hnv                       | β-hydroxynorvaline                               |

|          |                           |
|----------|---------------------------|
| Hyp      | 4-hydroxyproline          |
| Lys(TFA) | N-6-trifluoroacetyllysine |

**Table S2** Peptidase activity of LmClpP variants (1  $\mu$ M) with the substrates of the P1 library (100  $\mu$ M Ac-Ala-hArg-Xaa-ACC). Please refer to Table S1 for the names of non-natural amino acids. Data were measured in triplicates. <sup>a</sup>Peptide could not be obtained.

| P1 amino acid | LmClpP2                          | LmClpP1 <sup>m</sup> /2 <sup>wt</sup> | LmClpP1 <sup>wt</sup> /2 <sup>wt</sup> | LmClpP1 <sup>wt</sup> /2 <sup>m</sup> |
|---------------|----------------------------------|---------------------------------------|----------------------------------------|---------------------------------------|
|               | peptidase activity (au $\pm$ sd) |                                       |                                        |                                       |
| Ala           | 0.498 $\pm$ 0.010                | 0.343 $\pm$ 0.047                     | 0.324 $\pm$ 0.007                      | 0.022 $\pm$ 0.013                     |
| Arg           | 0.005 $\pm$ 0.017                | -0.002 $\pm$ 0.034                    | 0.000 $\pm$ 0.036                      | -0.021 $\pm$ 0.017                    |
| Asn           | 0.250 $\pm$ 0.017                | 0.131 $\pm$ 0.015                     | 0.188 $\pm$ 0.019                      | 0.019 $\pm$ 0.006                     |
| Asp           | -0.028 $\pm$ 0.018               | -0.017 $\pm$ 0.042                    | -0.013 $\pm$ 0.031                     | -0.066 $\pm$ 0.035                    |
| Gln           | 0.036 $\pm$ 0.011                | 0.020 $\pm$ 0.004                     | 0.116 $\pm$ 0.010                      | 0.090 $\pm$ 0.003                     |
| Glu           | 0.040 $\pm$ 0.015                | 0.007 $\pm$ 0.002                     | 0.156 $\pm$ 0.013                      | 0.141 $\pm$ 0.006                     |
| Gly           | 0.390 $\pm$ 0.003                | 0.214 $\pm$ 0.004                     | 0.254 $\pm$ 0.046                      | 0.012 $\pm$ 0.002                     |
| His           | 0.003 $\pm$ 0.012                | 0.002 $\pm$ 0.017                     | 0.006 $\pm$ 0.009                      | 0.011 $\pm$ 0.010                     |
| Ile           | 0.007 $\pm$ 0.010                | 0.004 $\pm$ 0.002                     | 0.023 $\pm$ 0.007                      | 0.003 $\pm$ 0.003                     |
| Leu           | 3.779 $\pm$ 0.014                | 3.783 $\pm$ 0.053                     | 4.075 $\pm$ 0.044                      | 0.457 $\pm$ 0.009                     |
| Lys           | -0.001 $\pm$ 0.002               | -0.031 $\pm$ 0.016                    | 0.009 $\pm$ 0.080                      | -0.018 $\pm$ 0.025                    |
| Met           | 7.237 $\pm$ 0.103                | 9.334 $\pm$ 0.309                     | 8.524 $\pm$ 0.221                      | 0.403 $\pm$ 0.004                     |
| Phe           | 1.325 $\pm$ 0.049                | 0.868 $\pm$ 0.005                     | 0.868 $\pm$ 0.017                      | 0.035 $\pm$ 0.003                     |
| Pro           | 0.009 $\pm$ 0.004                | -0.013 $\pm$ 0.010                    | 0.006 $\pm$ 0.002                      | 0.021 $\pm$ 0.002                     |
| Ser           | 0.054 $\pm$ 0.001                | 0.034 $\pm$ 0.036                     | 0.038 $\pm$ 0.006                      | 0.008 $\pm$ 0.019                     |
| Thr           | -0.015 $\pm$ 0.003               | -0.032 $\pm$ 0.012                    | -0.014 $\pm$ 0.019                     | -0.005 $\pm$ 0.003                    |
| Trp           | 0.066 $\pm$ 0.003                | 0.053 $\pm$ 0.003                     | 0.060 $\pm$ 0.007                      | 0.016 $\pm$ 0.006                     |
| Tyr           | 0.698 $\pm$ 0.053                | 0.463 $\pm$ 0.012                     | 0.483 $\pm$ 0.025                      | 0.012 $\pm$ 0.003                     |
| Val           | 0.048 $\pm$ 0.027                | 0.010 $\pm$ 0.007                     | 0.031 $\pm$ 0.004                      | 0.010 $\pm$ 0.005                     |
| D-Ala         | 0.025 $\pm$ 0.020                | -0.013 $\pm$ 0.020                    | 0.007 $\pm$ 0.002                      | 0.007 $\pm$ 0.005                     |
| D-Leu         | 0.028 $\pm$ 0.004                | 0.015 $\pm$ 0.008                     | 0.021 $\pm$ 0.000                      | -0.007 $\pm$ 0.041                    |
| D-Asp         | 0.015 $\pm$ 0.005                | -0.002 $\pm$ 0.004                    | 0.016 $\pm$ 0.005                      | 0.017 $\pm$ 0.007                     |
| D-Arg         | 0.010 $\pm$ 0.003                | 0.002 $\pm$ 0.006                     | 0.002 $\pm$ 0.001                      | 0.012 $\pm$ 0.002                     |
| D-Phe         | 0.043 $\pm$ 0.036                | 0.022 $\pm$ 0.006                     | 0.016 $\pm$ 0.007                      | 0.015 $\pm$ 0.005                     |
| Cit           | 0.012 $\pm$ 0.129                | 0.063 $\pm$ 0.089                     | 0.051 $\pm$ 0.012                      | 0.015 $\pm$ 0.008                     |
| Orn           | -0.327 $\pm$ 0.097               | -0.155 $\pm$ 0.077                    | 0.054 $\pm$ 0.101                      | 0.011 $\pm$ 0.087                     |
| hArg          | 0.011 $\pm$ 0.003                | 0.003 $\pm$ 0.006                     | 0.010 $\pm$ 0.006                      | 0.012 $\pm$ 0.003                     |
| Glu(O-Bzl)    | 4.319 $\pm$ 0.167                | 4.779 $\pm$ 0.458                     | 4.578 $\pm$ 0.220                      | 0.000 $\pm$ 0.003                     |
| Asp(O-Bzl)    | 5.907 $\pm$ 0.033                | 4.053 $\pm$ 0.123                     | 5.214 $\pm$ 0.092                      | 0.049 $\pm$ 0.003                     |
| hPhe          | 2.932 $\pm$ 0.031                | 2.959 $\pm$ 0.037                     | 2.658 $\pm$ 0.032                      | 0.014 $\pm$ 0.001                     |
| Cha           | 0.818 $\pm$ 0.007                | 1.067 $\pm$ 0.028                     | 0.937 $\pm$ 0.099                      | -0.023 $\pm$ 0.039                    |
| Thr(O-Bzl)    | 0.011 $\pm$ 0.001                | 0.019 $\pm$ 0.016                     | 0.013 $\pm$ 0.002                      | 0.017 $\pm$ 0.003                     |
| Phe(3,4-Cl2)  | 0.428 $\pm$ 0.034                | 0.197 $\pm$ 1.373                     | 0.446 $\pm$ 0.438                      | -0.055 $\pm$ 0.020                    |
| Pip           | n.d. <sup>a</sup>                | n.d. <sup>a</sup>                     | n.d. <sup>a</sup>                      | n.d. <sup>a</sup>                     |
| Abu           | 0.226 $\pm$ 0.015                | 0.284 $\pm$ 0.079                     | 0.291 $\pm$ 0.020                      | 0.037 $\pm$ 0.007                     |

|            |                   |                   |                   |                   |
|------------|-------------------|-------------------|-------------------|-------------------|
| nVal       | 0.914 ± 0.022     | 1.161 ± 0.017     | 1.226 ± 0.066     | 0.166 ± 0.043     |
| Met(O2)    | 1.496 ± 0.018     | 2.826 ± 0.043     | 2.467 ± 0.014     | 0.018 ± 0.002     |
| Dap        | 0.030 ± 0.038     | -0.043 ± 0.060    | 0.016 ± 0.018     | 0.103 ± 0.028     |
| Dab        | -0.009 ± 0.025    | -0.046 ± 0.008    | 0.009 ± 0.016     | 0.045 ± 0.006     |
| Phe(F5)    | 0.011 ± 0.002     | 0.014 ± 0.010     | 0.026 ± 0.008     | 0.002 ± 0.002     |
| Bpa        | 0.557 ± 0.014     | 0.688 ± 0.055     | 0.600 ± 0.020     | 0.000 ± 0.020     |
| hLeu       | 3.187 ± 0.024     | 7.057 ± 0.134     | 6.077 ± 0.220     | 0.033 ± 0.005     |
| nLeu       | 2.710 ± 0.037     | 5.156 ± 0.153     | 4.533 ± 0.102     | 0.091 ± 0.002     |
| Tic        | 0.100 ± 0.002     | 0.144 ± 0.003     | 0.153 ± 0.003     | 0.027 ± 0.003     |
| Igl        | 0.013 ± 0.002     | 0.015 ± 0.003     | 0.030 ± 0.005     | 0.006 ± 0.001     |
| 2-Aoc      | 6.619 ± 0.078     | 28.009 ± 0.282    | 21.948 ± 0.426    | 0.071 ± 0.002     |
| hSer       | 0.089 ± 0.014     | 0.058 ± 0.002     | 0.241 ± 0.015     | 0.180 ± 0.035     |
| Chg        | 0.029 ± 0.004     | 0.016 ± 0.002     | 0.044 ± 0.002     | 0.017 ± 0.005     |
| dhLeu      | n.d. <sup>a</sup> | n.d. <sup>a</sup> | n.d. <sup>a</sup> | n.d. <sup>a</sup> |
| Tle        | n.d. <sup>a</sup> | n.d. <sup>a</sup> | n.d. <sup>a</sup> | n.d. <sup>a</sup> |
| Arg(NO2)   | 0.018 ± 0.003     | 0.023 ± 0.004     | 0.033 ± 0.006     | 0.010 ± 0.008     |
| Glu(O-Me)  | 1.429 ± 0.014     | 2.116 ± 0.060     | 1.926 ± 0.027     | 0.050 ± 0.005     |
| Asp(O-Me)  | 1.012 ± 0.022     | 0.929 ± 0.043     | 1.053 ± 0.021     | 0.093 ± 0.001     |
| Phe(4-Cl)  | 1.084 ± 0.019     | 1.577 ± 0.188     | 1.283 ± 0.041     | 0.128 ± 0.004     |
| 4-Pal      | 0.066 ± 0.007     | 0.068 ± 0.000     | 0.086 ± 0.012     | 0.028 ± 0.000     |
| Ser(O-Bzl) | 1.488 ± 0.016     | 2.274 ± 0.040     | 1.997 ± 0.043     | 0.064 ± 0.005     |
| His(N-Bzl) | -0.001 ± 0.002    | 0.001 ± 0.004     | 0.012 ± 0.004     | 0.012 ± 0.009     |
| Hnv        | 0.192 ± 0.013     | 0.276 ± 0.030     | 0.268 ± 0.010     | 0.123 ± 0.123     |
| Hyp        | -0.081 ± 0.016    | -0.122 ± 0.090    | 0.018 ± 0.012     | -0.005 ± 0.011    |
| Lys(TFA)   | 0.524 ± 0.009     | 0.784 ± 0.023     | 0.710 ± 0.008     | 0.006 ± 0.007     |

**Table S3** Peptidase activity of LmClpP variants (1 μM) with the substrates of the P2 library (100 μM Ac-Ala-Xaa-Leu-ACC). Please refer to Table S1 for the names of non-natural amino acids. Data were measured in triplicates. <sup>a</sup>Peptide could not be obtained.

| P2 amino acid | LmClpP2                      | LmClpP1 <sup>m</sup> /2 <sup>wt</sup> | LmClpP1 <sup>wt</sup> /2 <sup>wt</sup> | LmClpP1 <sup>wt</sup> /2 <sup>m</sup> |
|---------------|------------------------------|---------------------------------------|----------------------------------------|---------------------------------------|
|               | peptidase activity (au ± sd) |                                       |                                        |                                       |
| Ala           | 0.118 ± 0.015                | 0.118 ± 0.019                         | 0.044 ± 0.002                          | -0.002 ± 0.007                        |
| Arg           | 0.777 ± 0.022                | 0.819 ± 0.026                         | 0.313 ± 0.010                          | 0.037 ± 0.011                         |
| Asn           | 0.057 ± 0.002                | 0.052 ± 0.012                         | 0.022 ± 0.002                          | 0.003 ± 0.002                         |
| Asp           | 0.002 ± 0.003                | -0.015 ± 0.008                        | -0.010 ± 0.002                         | -0.003 ± 0.001                        |
| Gln           | 0.391 ± 0.009                | 0.374 ± 0.015                         | 0.160 ± 0.009                          | 0.020 ± 0.007                         |
| Glu           | 0.030 ± 0.004                | 0.017 ± 0.003                         | 0.002 ± 0.001                          | 0.004 ± 0.004                         |
| Gly           | 0.017 ± 0.002                | 0.022 ± 0.031                         | 0.001 ± 0.003                          | 0.007 ± 0.006                         |
| His           | 0.099 ± 0.004                | 0.075 ± 0.007                         | 0.037 ± 0.004                          | 0.001 ± 0.007                         |
| Ile           | 0.049 ± 0.002                | 0.028 ± 0.006                         | 0.022 ± 0.004                          | 0.015 ± 0.004                         |
| Leu           | 0.371 ± 0.025                | 0.203 ± 0.031                         | 0.132 ± 0.018                          | 0.025 ± 0.013                         |
| Lys           | 0.618 ± 0.003                | 0.820 ± 0.002                         | 0.294 ± 0.007                          | 0.045 ± 0.001                         |
| Met           | 0.288 ± 0.011                | 0.407 ± 0.056                         | 0.198 ± 0.014                          | 0.046 ± 0.003                         |
| Phe           | 0.080 ± 0.056                | 0.011 ± 0.004                         | 0.010 ± 0.002                          | 0.002 ± 0.002                         |

|              |                   |                   |                   |                   |
|--------------|-------------------|-------------------|-------------------|-------------------|
| Pro          | -0.002 ± 0.005    | -0.013 ± 0.002    | -0.008 ± 0.003    | 0.008 ± 0.002     |
| Ser          | 0.302 ± 0.003     | 0.264 ± 0.002     | 0.105 ± 0.001     | 0.014 ± 0.002     |
| Thr          | 0.432 ± 0.021     | 0.352 ± 0.023     | 0.151 ± 0.011     | 0.029 ± 0.007     |
| Trp          | 0.324 ± 0.024     | 0.065 ± 0.001     | 0.092 ± 0.012     | -0.003 ± 0.014    |
| Tyr          | -0.001 ± 0.018    | 0.002 ± 0.001     | -0.024 ± 0.014    | -0.010 ± 0.017    |
| Val          | 0.012 ± 0.013     | 0.001 ± 0.001     | -0.003 ± 0.004    | 0.000 ± 0.003     |
| D-Ala        | -0.002 ± 0.002    | -0.012 ± 0.001    | 0.000 ± 0.019     | -0.002 ± 0.000    |
| D-Leu        | 0.006 ± 0.003     | 0.002 ± 0.005     | -0.008 ± 0.011    | 0.002 ± 0.002     |
| D-Asp        | -0.001 ± 0.003    | -0.027 ± 0.026    | 0.002 ± 0.009     | 0.008 ± 0.005     |
| D-Arg        | n.d. <sup>a</sup> | n.d. <sup>a</sup> | n.d. <sup>a</sup> | n.d. <sup>a</sup> |
| D-Phe        | -0.115 ± 0.117    | -0.001 ± 0.034    | -0.029 ± 0.016    | 0.001 ± 0.007     |
| Cit          | 0.427 ± 0.022     | 0.428 ± 0.002     | 0.183 ± 0.024     | 0.020 ± 0.003     |
| Orn          | 0.290 ± 0.002     | 0.308 ± 0.011     | 0.134 ± 0.005     | 0.033 ± 0.003     |
| hArg         | 1.205 ± 0.016     | 1.645 ± 0.022     | 0.592 ± 0.011     | 0.149 ± 0.007     |
| Glu(O-Bzl)   | 0.219 ± 0.021     | 0.201 ± 0.015     | 0.095 ± 0.010     | 0.003 ± 0.010     |
| Asp(O-Bzl)   | 0.002 ± 0.005     | -0.016 ± 0.004    | -0.010 ± 0.002    | 0.003 ± 0.002     |
| hPhe         | 0.051 ± 0.004     | 0.109 ± 0.003     | 0.034 ± 0.004     | 0.025 ± 0.005     |
| Cha          | 0.305 ± 0.021     | 0.148 ± 0.011     | 0.019 ± 0.008     | 0.009 ± 0.016     |
| Thr(O-Bzl)   | 0.037 ± 0.002     | 0.031 ± 0.016     | -0.007 ± 0.009    | 0.015 ± 0.008     |
| Phe(3,4-Cl2) | 0.050 ± 0.010     | 0.025 ± 0.005     | 0.000 ± 0.003     | 0.007 ± 0.002     |
| Pip          | 0.001 ± 0.014     | -0.018 ± 0.013    | -0.006 ± 0.021    | -0.003 ± 0.002    |
| Abu          | 0.030 ± 0.022     | 0.000 ± 0.001     | -0.009 ± 0.014    | 0.001 ± 0.003     |
| nVal         | 0.419 ± 0.038     | 0.546 ± 0.047     | 0.035 ± 0.008     | -0.005 ± 0.018    |
| Met(O2)      | 0.475 ± 0.044     | 0.672 ± 0.049     | 0.056 ± 0.012     | 0.081 ± 0.014     |
| Dap          | -0.039 ± 0.124    | 0.018 ± 0.003     | -0.006 ± 0.018    | 0.011 ± 0.001     |
| Dab          | 0.105 ± 0.005     | 0.073 ± 0.003     | 0.006 ± 0.002     | 0.011 ± 0.001     |
| Phe(F5)      | 0.037 ± 0.008     | 0.047 ± 0.002     | -0.009 ± 0.011    | 0.008 ± 0.005     |
| Bpa          | 0.017 ± 0.022     | 0.015 ± 0.015     | -0.006 ± 0.002    | 0.013 ± 0.008     |
| hLeu         | 0.353 ± 0.022     | 0.505 ± 0.190     | 0.050 ± 0.004     | 0.020 ± 0.026     |
| nLeu         | 0.197 ± 0.002     | 0.322 ± 0.080     | 0.040 ± 0.008     | 0.030 ± 0.013     |
| Tic          | -0.019 ± 0.033    | -0.007 ± 0.005    | 0.010 ± 0.014     | 0.018 ± 0.003     |
| Igl          | 0.119 ± 0.004     | 0.096 ± 0.002     | 0.025 ± 0.029     | 0.008 ± 0.001     |
| 2-Aoc        | 0.049 ± 0.008     | 0.056 ± 0.076     | 0.012 ± 0.020     | 0.035 ± 0.063     |
| hSer         | 0.244 ± 0.019     | 0.213 ± 0.018     | 0.021 ± 0.001     | 0.012 ± 0.010     |
| Chg          | 0.070 ± 0.010     | 0.048 ± 0.007     | 0.001 ± 0.005     | -0.011 ± 0.035    |
| dhLeu        | n.d. <sup>a</sup> | n.d. <sup>a</sup> | n.d. <sup>a</sup> | n.d. <sup>a</sup> |
| Tle          | -0.001 ± 0.004    | -0.010 ± 0.002    | -0.013 ± 0.001    | -0.013 ± 0.037    |
| Arg(NO2)     | 1.118 ± 0.012     | 1.019 ± 0.048     | 0.123 ± 0.003     | 0.058 ± 0.010     |
| Glu(O-Me)    | 0.382 ± 0.033     | 0.633 ± 0.019     | 0.042 ± 0.007     | 0.050 ± 0.007     |
| Asp(O-Me)    | 0.014 ± 0.002     | 0.001 ± 0.002     | 0.000 ± 0.004     | 0.006 ± 0.001     |
| Phe(4-Cl)    | 0.006 ± 0.025     | 0.007 ± 0.001     | -0.006 ± 0.010    | -0.001 ± 0.007    |
| 4-Pal        | 0.350 ± 0.004     | 0.272 ± 0.007     | 0.043 ± 0.007     | 0.027 ± 0.009     |
| Ser(O-Bzl)   | 0.230 ± 0.020     | 0.233 ± 0.017     | 0.025 ± 0.001     | 0.024 ± 0.002     |
| His(N-Bzl)   | 0.166 ± 0.022     | 0.124 ± 0.022     | 0.013 ± 0.006     | 0.035 ± 0.001     |
| Hnv          | 0.321 ± 0.017     | 0.321 ± 0.036     | 0.025 ± 0.005     | 0.019 ± 0.002     |



|          |                |                |                |                |
|----------|----------------|----------------|----------------|----------------|
| Hyp      | -0.003 ± 0.002 | -0.008 ± 0.006 | -0.012 ± 0.003 | -0.011 ± 0.010 |
| Lys(TFA) | 1.068 ± 0.019  | 2.135 ± 0.040  | 0.141 ± 0.007  | 0.052 ± 0.007  |

**Table S4** Peptidase activity of LmClpP variants (1 µM) with the substrates of the P3 library (100 µM Ac-Xaa-hArg-Leu-ACC). Please refer to Table S1 for the names of non-natural amino acids. Data were measured in triplicates. <sup>a</sup>Peptide could not be obtained.

| P3 amino acid             | LmClpP2                      | LmClpP1 <sup>m</sup> /2 <sup>wt</sup> | LmClpP1 <sup>wt</sup> /2 <sup>wt</sup> | LmClpP1 <sup>wt</sup> /2 <sup>m</sup> |
|---------------------------|------------------------------|---------------------------------------|----------------------------------------|---------------------------------------|
|                           | peptidase activity (au ± sd) |                                       |                                        |                                       |
| Ala                       | 1.073 ± 0.091                | 1.721 ± 0.145                         | 1.629 ± 0.133                          | 0.107 ± 0.007                         |
| Arg                       | -0.056 ± 0.008               | -0.136 ± 0.017                        | -0.071 ± 0.006                         | -0.143 ± 0.002                        |
| Asn                       | 0.222 ± 0.014                | 0.072 ± 0.032                         | 0.247 ± 0.032                          | 0.042 ± 0.009                         |
| Asp                       | -0.068 ± 0.027               | -0.175 ± 0.003                        | -0.103 ± 0.061                         | -0.184 ± 0.008                        |
| Gln                       | 0.080 ± 0.026                | -0.016 ± 0.015                        | 0.011 ± 0.068                          | -0.094 ± 0.018                        |
| Glu                       | 0.089 ± 0.029                | -0.095 ± 0.007                        | -0.022 ± 0.006                         | -0.137 ± 0.016                        |
| Gly                       | 0.138 ± 0.013                | 0.031 ± 0.014                         | 0.102 ± 0.020                          | -0.074 ± 0.010                        |
| His                       | 0.378 ± 0.072                | 0.202 ± 0.020                         | 0.478 ± 0.016                          | 0.126 ± 0.020                         |
| Ile                       | 0.003 ± 0.005                | 3.677 ± 0.201                         | 3.090 ± 0.075                          | 0.387 ± 0.025                         |
| Leu                       | 0.005 ± 0.006                | 2.910 ± 0.291                         | 2.336 ± 0.170                          | 0.108 ± 0.016                         |
| Lys                       | -0.011 ± 0.020               | -0.122 ± 0.007                        | -0.063 ± 0.017                         | -0.050 ± 0.020                        |
| Met                       | 0.001 ± 0.001                | 1.179 ± 0.055                         | 1.256 ± 0.016                          | 0.155 ± 0.038                         |
| Phe                       | 2.663 ± 0.089                | 4.251 ± 0.056                         | 4.561 ± 0.126                          | 1.497 ± 0.066                         |
| Pro                       | 1.382 ± 0.216                | 3.397 ± 0.168                         | 2.682 ± 0.163                          | -0.060 ± 0.039                        |
| Ser                       | 0.364 ± 0.074                | 0.223 ± 0.029                         | 0.297 ± 0.002                          | 0.033 ± 0.023                         |
| Thr                       | 0.528 ± 0.023                | 0.485 ± 0.010                         | 0.583 ± 0.020                          | 0.116 ± 0.011                         |
| Trp                       | 1.290 ± 0.115                | 1.189 ± 0.164                         | 2.124 ± 0.156                          | 2.068 ± 0.013                         |
| Tyr                       | 0.852 ± 0.053                | 0.633 ± 0.041                         | 1.782 ± 0.038                          | 1.665 ± 0.018                         |
| Val                       | 1.411 ± 0.106                | 1.240 ± 0.081                         | 1.082 ± 0.038                          | 0.181 ± 0.070                         |
| D-Ala                     | 0.066 ± 0.012                | -0.083 ± 0.029                        | -0.030 ± 0.013                         | -0.156 ± 0.030                        |
| D-Leu                     | -0.007 ± 0.018               | -0.099 ± 0.005                        | -0.070 ± 0.006                         | -0.128 ± 0.008                        |
| D-Asp                     | -0.063 ± 0.009               | -0.210 ± 0.031                        | -0.118 ± 0.024                         | -0.216 ± 0.034                        |
| D-Arg                     | 0.102 ± 0.002                | 0.033 ± 0.002                         | 0.041 ± 0.002                          | -0.008 ± 0.003                        |
| D-Phe                     | 0.315 ± 0.026                | 0.168 ± 0.020                         | 0.147 ± 0.007                          | 0.002 ± 0.005                         |
| Cit                       | 0.066 ± 0.044                | -0.127 ± 0.014                        | 0.238 ± 0.015                          | 0.191 ± 0.014                         |
| Orn                       | -0.024 ± 0.023               | -0.097 ± 0.013                        | -0.044 ± 0.007                         | -0.038 ± 0.005                        |
| hArg                      | -0.022 ± 0.025               | -0.183 ± 0.009                        | -0.045 ± 0.059                         | -0.126 ± 0.049                        |
| Glu(O-Bzl)                | 0.170 ± 0.011                | 0.115 ± 0.012                         | 0.135 ± 0.007                          | 0.027 ± 0.006                         |
| Asp(O-Bzl)                | 0.253 ± 0.037                | 0.152 ± 0.011                         | 0.294 ± 0.024                          | 0.170 ± 0.010                         |
| hPhe                      | 0.442 ± 0.121                | 0.109 ± 0.104                         | 1.392 ± 0.092                          | 2.645 ± 0.035                         |
| Cha                       | 0.661 ± 0.017                | 0.594 ± 0.004                         | 0.957 ± 0.042                          | 1.016 ± 0.023                         |
| Thr(O-Bzl)                | 1.057 ± 0.025                | 1.366 ± 0.020                         | 1.083 ± 0.011                          | 0.209 ± 0.012                         |
| Phe(3,4-Cl <sub>2</sub> ) | 3.912 ± 0.100                | 3.923 ± 0.132                         | 4.219 ± 0.198                          | 4.960 ± 0.129                         |
| Pip                       | n.d. <sup>a</sup>            | n.d. <sup>a</sup>                     | n.d. <sup>a</sup>                      | n.d. <sup>a</sup>                     |
| Abu                       | 1.196 ± 0.038                | 2.010 ± 0.046                         | 1.722 ± 0.083                          | 0.700 ± 0.031                         |
| nVal                      | 2.088 ± 0.033                | 3.292 ± 0.035                         | 2.518 ± 0.025                          | 0.452 ± 0.006                         |

|            |                |                |                |                |
|------------|----------------|----------------|----------------|----------------|
| Met(O2)    | 0.028 ± 0.006  | -0.036 ± 0.021 | -0.086 ± 0.017 | -0.060 ± 0.007 |
| Dap        | -0.090 ± 0.021 | -0.131 ± 0.033 | -0.105 ± 0.043 | -0.017 ± 0.035 |
| Dab        | -0.053 ± 0.018 | -0.090 ± 0.008 | -0.097 ± 0.012 | -0.012 ± 0.017 |
| Phe(F5)    | 0.097 ± 0.045  | -0.075 ± 0.022 | -0.084 ± 0.052 | -0.027 ± 0.075 |
| Bpa        | 0.057 ± 0.015  | -0.030 ± 0.018 | -0.028 ± 0.009 | -0.044 ± 0.014 |
| hLeu       | 0.815 ± 0.023  | 0.738 ± 0.009  | 0.629 ± 0.014  | 0.197 ± 0.002  |
| nLeu       | 1.165 ± 0.041  | 1.244 ± 0.073  | 1.145 ± 0.023  | 0.416 ± 0.017  |
| Tic        | 0.413 ± 0.015  | 0.323 ± 0.037  | 0.242 ± 0.018  | 0.002 ± 0.007  |
| Igl        | 0.454 ± 0.031  | 0.260 ± 0.018  | 0.838 ± 0.037  | 1.697 ± 0.045  |
| 2-Aoc      | 2.527 ± 0.156  | 1.447 ± 0.028  | 5.529 ± 0.201  | 5.423 ± 0.313  |
| hSer       | 0.219 ± 0.028  | 0.148 ± 0.039  | 0.157 ± 0.031  | 0.153 ± 0.024  |
| Chg        | 1.736 ± 0.053  | 1.734 ± 0.056  | 1.401 ± 0.037  | -0.030 ± 0.013 |
| dhLeu      | 0.495 ± 0.016  | 0.435 ± 0.017  | 0.339 ± 0.006  | 0.022 ± 0.028  |
| Tle        | 0.958 ± 0.013  | 1.017 ± 0.019  | 0.729 ± 0.007  | 0.026 ± 0.003  |
| Arg(NO2)   | -0.064 ± 0.019 | -0.086 ± 0.017 | -0.107 ± 0.024 | -0.035 ± 0.020 |
| Glu(O-Me)  | 0.249 ± 0.028  | 0.235 ± 0.021  | 0.305 ± 0.021  | 0.214 ± 0.008  |
| Asp(O-Me)  | 0.118 ± 0.035  | 0.074 ± 0.013  | 0.205 ± 0.017  | 0.256 ± 0.020  |
| Phe(4-Cl)  | 1.620 ± 0.033  | 1.625 ± 0.041  | 2.380 ± 0.046  | 1.981 ± 0.022  |
| 4-Pal      | 0.212 ± 0.003  | 0.134 ± 0.006  | 0.103 ± 0.004  | 0.025 ± 0.002  |
| Ser(O-Bzl) | 0.691 ± 0.077  | 0.663 ± 0.018  | 1.126 ± 0.019  | 1.230 ± 0.040  |
| His(N-Bzl) | -0.041 ± 0.020 | -0.083 ± 0.014 | -0.099 ± 0.011 | -0.047 ± 0.011 |
| Hnv        | 0.111 ± 0.023  | 0.015 ± 0.004  | -0.006 ± 0.009 | 0.048 ± 0.031  |
| Hyp        | 1.152 ± 0.067  | 1.577 ± 0.015  | 1.075 ± 0.008  | 0.099 ± 0.003  |
| Lys(TFA)   | -0.091 ± 0.029 | -0.001 ± 0.027 | -0.031 ± 0.013 | 0.190 ± 0.016  |

**Table S5** List of primers used in this study

| Primer     | Sequence (5'-3')                                                                                             |
|------------|--------------------------------------------------------------------------------------------------------------|
| LmGlyA_for | ggggacaagttgtacaaaaaagcaggctttgtctatttacaaaagcaagataaggaag                                                   |
| LmGlyA_rev | ggggaccactttgtacaagaaagctgggtgttattaggcagcgaaagctaggtttgttttctttgcctgc<br>gctgcctaaacttgataaagcggatattcatttg |
| LmPncB_for | ggggacaagttgtacaaaaaagcaggctttacaaatttttcaagatgatagtc                                                        |
| LmPncB_rev | ggggaccactttgtacaagaaagctgggtgttattaggcagcgaaagctaggtttgttttctttgcctgc<br>gctgccaaacggcatatctagttcaac        |

### 3. Biochemical Procedures

#### *Cloning, protein overexpression*

LmClpP2, LmClpP2(S98A), LmClpP1(N172D) and SaClpP were obtained as described previously.<sup>2-4</sup> Expression constructs with C-terminal Strep-tag II were cloned in pET301 plasmids, overexpressed in *E. coli* BL21(DE3) and purified with affinity chromatography and gel filtration.

LmClpP1<sup>wt</sup>/2<sup>wt</sup>, LmClpP1<sup>wt</sup>/2<sup>m</sup>, LmClpP1<sup>m</sup>/2<sup>wt</sup> and LmClpP1<sup>wt</sup>/2<sup>wt</sup> heterocomplex variants were overexpressed and purified as detailed previously.<sup>4</sup> In short, C-terminally Strep-II-tagged LmClpP1 and C-terminally His<sub>6</sub>-tagged LmClpP2 were introduced into pETDuet-1 vector. Proteins were overexpressed in *E. coli* BL21(DE3) at 37 °C for 6 h after induction with 1 mM isopropyl-β-D-thiogalactoside (IPTG). After harvest the cells were lysed in His-lysis-buffer (20 mM MOPS, 100 mM KCl, 1% CHAPS, 5% glycerol, pH 8.0). The proteins from the cleared cell lysate were captured by Ni<sup>2+</sup> affinity chromatography in His buffers (20 mM MOPS, 100 mM KCl, 5% glycerol, pH 8.0, +40 mM imidazole for washing, +300 mM imidazole for elution) and a subsequent StrepTactin chromatography step in Strep buffers (100 mM Tris, 150 mM NaCl, 1 mM EDTA, pH 8.0, +2.5 mM desthiobiotin for elution). A final gel filtration was performed in LmClpP-GF buffer (20 mM MOPS, 100 mM KCl, 5% glycerol, pH 7.0).

Tagfree LmClpX was overexpressed in *E. coli* BL21(DE3) or in SG1146a ( $\Delta clpP$ ). In both cases, an expression construct equipped with an N-terminal His<sub>6</sub>-tag and a TEV cleavage site in pET300 vector was used.<sup>4</sup> 4 L LB medium were inoculated (1:100) and grown to OD<sub>600</sub> 0.6 at 37 °C. After induction with 0.5 mM IPTG the cells were incubated over night at 25 °C. The cells were harvested by centrifugation, washed in PBS, resuspended in ClpX lysis buffer (25 mM HEPES, 200 mM KCl, 1 mM DTT, 5% glycerol, 0.5 mM ATP, 5 mM MgCl<sub>2</sub>, pH 7.6) and lysed by ultrasonication. The cell debris was removed by centrifugation (38,000 g, 40 min, 4 °C) and the cell lysate was loaded on a 5 mL HisTrap HP column (GE Healthcare) using an ÄKTA Purifier 10 system (GE Healthcare). The column was washed with 12 column volumes (CV) ClpX wash buffer (25 mM HEPES, 200 mM KCl, 1 mM DTT, 5% glycerol, 40 mM imidazole, pH 7.6). The protein was eluted with 6 CV ClpX elution buffer (25 mM HEPES, 200 mM KCl, 1 mM DTT, 5% glycerol, 300 mM imidazole, pH 7.6). The protein fractions were pooled, 1 mM EDTA and 1.25 mg TEV protease were added and the reaction mixture was incubated at 10 °C over night. The completeness of the TEV cleavage was verified by intact-protein mass-spectrometry. The protein solution was loaded on a Superdex 200 pg 16/60 column (GE Healthcare) and eluted in ClpX lysis buffer.

Tagfree SaClpX was purified as described previously.<sup>5</sup> In short, for the overexpression of SaClpX with an N-terminal His<sub>6</sub>-tag and TEV site pET301 vector was used in *E. coli* BL21(DE3) cells. The cell lysate was loaded on a HisTrap HP column (GE Healthcare). TEV protease and 1 mM EDTA were added to the pooled fractions. After cleavage and removal of imidazole, the protein solution was loaded on a HisTrap HP column and the flow-through was collected which was further purified by gel filtration.

N-terminally Strep-II-tagged eGFP with a C-terminal SsrA tag (AGKEKQNLAFAA for *L. monocytogenes* and AANDENYALAA for *E. coli*) was overexpressed in *E. coli* KY2266 ( $\Delta clpXP$ ,  $\Delta lon$ ,  $\Delta hslVU$ )<sup>6</sup> using pDEST007 expression vector and purified by affinity chromatography and gel filtration as described previously.<sup>4,5</sup>

GlyA (UniProt entry Q8Y4B2) and PncB (UniProt entry Q8Y826) with an N-terminal Strep-II tag and a C-terminal LmSsrA tag (AGKEKQNLAFAA) were constructed from *L. monocytogenes* EGD-e genomic DNA

in pDEST007 plasmid vector with Gateway® Technology using the primers listed in Table S5. The plasmids were transformed into *E. coli* SG1146a cells. 2 L LB culture was induced with 0.2 µg/mL anhydroteracycline after reaching an OD<sub>600</sub> of 0.6. GlyA was incubated at 37 °C for 5 hours and PncB at 25 °C over night. Cells were harvested by centrifugation, washed with PBS, resuspended in PBS and ultrasonicated on ice. The cell lysate was cleared by centrifugation (38,000 g, 40 min, 4 °C) and loaded on a pre-equilibrated 5 mL StrepTrap HP column (GE Healthcare). The column was washed with 6 CV binding buffer (100 mM Tris-HCl, 150 mM NaCl, 1 mM EDTA, pH 8.0) and eluted with 5 CV binding buffer + 2.5 mM desthiobiotin. EcRpoS and SaGudB with SsrA tags (AANDENYALAA and AGKSNNNFAVAA, respectively) were purified similarly as described elsewhere.<sup>7</sup>

Creatine kinase (10 127 566 001), lactate dehydrogenase (10 128 155 001) and pyruvate kinase (10 127 876 001) were purchased from Roche.

### *Peptidase assay*

In the substrate library screening following fluorogenic tripeptide substrate libraries were used: Ac-Ala-hArg-Xaa-ACC for P1 site, Ac-Ala-Xaa-Leu-ACC for P2 site and Ac-Xaa-hArg-Leu-ACC for P3 site. 1 µL substrate (100x stock in DMSO, 100 µM final concentration) was added to a flat bottom black 96-well plate and equilibrated to 32 °C. LmClpP (1 µM) in preheated peptidase buffer (100 mM HEPES, 100 mM KCl, 15% glycerol, pH 7.0) was added to a final volume of 100 µL to start the reaction, and fluorescence (excitation: 380 nm, emission: 440 nm) was measured with an infinite M200Pro plate reader (Tecan). Data were recorded in triplicate.

For the testing of inhibitors 1 µL inhibitor (100x stock in DMSO, 1 µM, 10 µM and 100 µM final concentrations) and LmClpP (1 µM) in peptidase buffer (100 µL final volume) were incubated for 30 min at 32 °C. 1 µL (100x stock in DMSO, 200 µM final concentration) Ac-Ala-hArg-Leu-ACC substrate was added and the fluorescence was measured (380 nm, 430 nm). Data were recorded in triplicate and two independent experiments were performed.

Peptidase activity was determined by linear regression using Microsoft Excel and plots were made with Microcal OriginPro 2016.

### *Protease assay*

Protease assays were carried out in flat bottom white 96-well plates in a final volume of 60 µL. 0.6 µL inhibitor (100x DMSO stock, 0.1 – 100 µM final concentrations), ClpP<sub>14</sub> (0.2 µM), ClpX<sub>6</sub> (0.4 µM) and ATP regeneration mix (4 mM ATP, 16 mM creatine phosphate, 20 U/mL creatine kinase) were pre-incubated for 15 min at 30 °C in protease buffer (25 mM HEPES, 200 mM KCl, 5 mM MgCl<sub>2</sub>, 1 mM DTT, 10% glycerol, pH 7.6). 0.4 µM eGFP-SsrA substrate was added and fluorescence was measured (485 nm, 535 nm). Data were recorded in triplicate and at least two independent experiments were performed. Protease activity was determined by linear regression using Microsoft Excel and plots were made with Microcal OriginPro 2016.

For the determination of K<sub>app</sub> values the LmClpP<sub>14</sub> concentration was varied (2 nM – 8000 nM). If needed, **Aoc-CMK** (100x stock in DMSO, final concentration = 25×LmClpP<sub>14</sub> concentration) or DMSO was added. In case of the GFP unfolding assay, LmClpP2(S98A) and LmClpP1(S98A)/LmClpP2(S98A)

mutants were used in varying concentrations (10 nM – 30  $\mu$ M) in presence of 0.4  $\mu$ M LmClpX<sub>6</sub> and 0.125  $\mu$ M eGFP-SsrA. Data were recorded in triplicate and at least two independent experiments were performed. Slopes were determined by linear regression using Microsoft Excel. Protease activity was plotted against LmClpP<sub>14</sub> concentration in Microcal OriginPro 2016 and was fitted to the Hill equation:

$$y = V_{\min} + (V_{\max} - V_{\min}) \frac{x^n}{K_{\text{app}}^n + x^n}.$$

#### *ATPase assay*

0.85  $\mu$ L **Aoc-CMK** (100x DMSO stock, 4.25  $\mu$ M final concentration) or DMSO were added to a flat bottom transparent 96-well plate. LmClpX<sub>6</sub> (0.2  $\mu$ M) and LmClpP<sub>214</sub> (0.1  $\mu$ M) were added in ATPase buffer (100 mM HEPES, 200 mM KCl, 20 mM MgCl<sub>2</sub>, 1 mM DTT, 1 mM NADH, 2 mM phosphoenolpyruvate, 50 U/mL lactate dehydrogenase, 50 U/mL pyruvate kinase, 5% glycerol, pH 7.5) and incubated for 12 min at 37 °C. The reaction was started by the addition of 20 mM ATP. Absorption at 340 nm was measured. Three independent experiments with four replicates each were carried out. ATPase activity was determined by linear regression using Microsoft Excel after subtraction of the background signal (measurement without LmClpX), the plot was made with Microcal OriginPro 2016.

#### *Analysis of LmClpXP protein substrate digests*

LmClpP<sub>14</sub> (0.2  $\mu$ M), LmClpX<sub>6</sub> (0.4  $\mu$ M), SsrA-tagged substrate protein (1  $\mu$ M) and ATP regeneration mix (4 mM ATP, 16 mM creatine phosphate, 20 U/mL creatine kinase) were incubated over night at 37 °C in protease buffer (25 mM HEPES, 200 mM KCl, 5 mM MgCl<sub>2</sub>, 1 mM DTT, 10% glycerol, pH 7.6).

The samples were desalted using reverse phase extraction cartridges (tC18 SepPak, 50 mg, Waters) on a vacuum manifold. Cartridges were washed three times with 1 mL acetonitrile (ACN), 1 mL 50% ACN with 0.5% formic acid (FA) and twice with 1 mL 0.1% FA. After addition of FA to a final concentration of 0.5% FA, the samples were loaded on the cartridges, washed with 1 mL 0.1% FA and twice with 1 mL 0.5% FA. Peptides were eluted into low binding reaction tubes (Eppendorf) with 3×200  $\mu$ L 80% ACN with 0.5% FA. The eluates were vacuum dried. The dried samples were dissolved in 100  $\mu$ L 1% FA, ultrasonicated for 15 min and filtered on a 0.45  $\mu$ m pore size filter.

LC-MS/MS analysis was carried out on a Dionex UltiMate 3000 nano HPLC coupled to a Thermo Finnigan Orbitrap XL. Samples were loaded onto a C18 NanoTrap Column (Acclaim C18 PepMap100, 2 cm×10  $\mu$ m i.d., 5  $\mu$ m particle size, 300 Å pore size) and separated on a Dionex C18 PepMap RSLC (Acclaim C18 PepMap RSLC, 50 cm×75  $\mu$ m i.d., 2  $\mu$ m particle size, 100 Å pore size) column. Solvent A consisted of water + 0.1% FA + 5% DMSO and solvent B consisted of ACN + 0.1% FA + 5% DMSO. Separation was achieved at a constant flow rate of 0.2  $\mu$ L/min using a gradient from 4% B to 30% B over 90 min and a subsequent wash-out to 80% B over 33 min. Full scans were carried out with an m/z range of 350 – 1400 at a resolution of 60000 followed by a TOP5 CID fragmentation step (35 eV collision energy, activation time: 30 ms) using dynamic exclusion (30 s).

Fragmentation spectra were searched using the SEQUEST HT algorithm against a custom compiled proteome including contaminants using Proteome Discoverer 1.4. Cleavages were allowed after every amino acid, but the search was limited to monoisotopic precursor ions and a peptide mass tolerance of < 10 ppm. Oxidation (+15.995 Da) was set as dynamic modification at methionine residues in all

runs. Peptides were validated by the Percolator algorithm with FDR = 0.01 and  $\Delta C_n = 0.05$ . All peptide-to-spectrum matches passing the validation were then exported and further analyzed in a custom-built and openly available web-script called Protein|Clipper ([www.oc2.ch.tum.de](http://www.oc2.ch.tum.de)). For a detailed depiction of the workflow see Gersch/Stahl/Poreba et al.<sup>7</sup>

#### *Intact-protein mass-spectrometry*

0.2  $\mu$ M LmClpP<sub>214</sub>, 0.4  $\mu$ M LmClpP<sub>26</sub>, and **Aoc-CMK** (100x DMSO stock, 1  $\mu$ M, 5  $\mu$ M, 10  $\mu$ M and 100  $\mu$ M final concentrations) were incubated with ATP regeneration mix (4 mM ATP, 16 mM creatine phosphate, 20 U/mL creatine kinase) in protease buffer (25 mM HEPES, 200 mM KCl, 5 mM MgCl<sub>2</sub>, 1 mM DTT, 10% glycerol, pH 7.6) at 30 °C for 15 min. Measurements were carried out on a Dionex Ultimate 3000 HPLC system coupled to a Thermo LTQ-FT Ultra mass-spectrometer with electrospray ionisation source (spray voltage 4.0 kV, tube lens 110 V, capillary voltage 48 V, sheath gas 60 a.u., aux gas 10 a.u., sweep gas 0.2 a.u.). 5  $\mu$ L of reaction mixtures were desalted with a Massprep desalting cartridge (Waters). The mass spectrometer was operated in positive mode collecting full scans at high resolution ( $R = 200,000$ ) from  $m/z$  600 to  $m/z$  2000. Collected data was deconvoluted using the Thermo Xcalibur Xtract algorithm. Data was recorded in triplicate.

#### *Analytical gel filtration*

20  $\mu$ M LmClpP<sub>2</sub> was incubated for 10 min at room temperature with 100  $\mu$ M inhibitor in GF buffer (20 mM MOPS, 100 mM KCl, 5% glycerol, pH 7.0). 150  $\mu$ L of the samples were loaded on a pre-equilibrated Superdex 200 10/300 gel filtration column (GE Healthcare) connected to an ÄKTA Purifier 10 system (GE Healthcare) and eluted with 1 CV GF buffer. UV absorption was recorded at 280 nm. The oligomerization state was determined by comparison of the elution volumes to the calibration curve of the column (Gel Filtration Calibration Kit, GE Healthcare).

## 4. Chemical synthesis

### CMK inhibitors

The general procedure for the peptide-CMK inhibitors was adapted from Kato et al.<sup>8</sup> A 0.2 M solution of the Boc-*L*-Leu-OH amino acid (5 mmol) in anhydrous THF was stirred in a ice/acetone bath at -10 °C for 15 min. Then, 4-methylmorpholine (6.25 mmol, 1.25 eq) and isobutyl chloroformate (5.75 mmol, 1.15 eq) were added dropwise. The reaction was carried out in the ice/acetone bath for 45 min. In parallel, diazomethane (around 20 mmol) was generated according to the AL-180 (Aldrich Technical Bulletin) protocol. Next, the solution of mixed anhydrides was slowly added to the ethereal solution of diazomethane at 0 °C (ice bath). The mixture was stirred for 5 min, then the ice bath was removed and the reaction was carried out for 3 hours at room temperature. In order to obtain Boc-*L*-Leu-CH<sub>2</sub>Cl, 15 mL of a 1:1 of concentrated HCl and glacial acetic acid was added dropwise to the mixture (room temperature). After Boc-*L*-Leu-CH<sub>2</sub>N<sub>2</sub> was fully converted into Boc-*L*-Leu-CH<sub>2</sub>Cl (HPLC analysis) the mixture was diluted 10x with ethyl acetate, transferred to a separatory funnel and extracted with water (1x), saturated aqueous NaHCO<sub>3</sub> (3x) and brine (2x). The organic fraction was collected, dried over MgSO<sub>4</sub> and evaporated under reduced pressure. The Boc-*L*-Leu-CH<sub>2</sub>Cl was obtained as a pale yellow oil. Next, the Boc group was removed with 25% solution of TFA in DCM (stirring for 30 min). After the deprotection reaction was complete (HPLC analysis), TFA and DCM were removed under reduced pressure and NH<sub>2</sub>-*L*-Leu-CMK was obtained as pale yellow oil. The product was used for further synthesis without purification. In a separate synthesis the Ac-*L*-Phe(3,4-Cl<sub>2</sub>)-*L*-hArg(Boc)<sub>2</sub>-OH peptide fragment was synthesized on 2-chlorotrityl chloride resin. Fmoc-*L*-hArg(Boc)<sub>2</sub>-OH (2 eq) was dissolved in the minimal volume of anhydrous DCM, followed by addition of DIPEA (3 eq). The amino acid was activated for a minute and poured onto the resin (1 eq). The reaction mixture was agitated for 5 hours. Then the Fmoc group was removed with 20% piperidine in dry DMF in three cycles (5 min, 5 min, 25 min). Next, the Fmoc-*L*-Phe(3,4-Cl<sub>2</sub>)-OH (2 eq) amino acid was coupled to the NH<sub>2</sub>-*L*-hArg(Boc)<sub>2</sub>-resin (1 eq) using HATU (2 eq) and collidine (2 eq) as coupling reagents. The reaction was carried out for 3 hours. Next, the Fmoc group was removed as previously and the free N-termini was acetylated with AcOH (1.5 eq), HBTU (1.5 eq) and DIPEA (1.5 eq) for 30 min to obtain Ac-Phe(3,4-Cl<sub>2</sub>)-*L*-hArg(Boc)<sub>2</sub>-resin. After the acetylation was complete, the resin was washed with DMF (3x), DCM (3x), and MeOH (3 eq) and dried over P<sub>2</sub>O<sub>5</sub> overnight. The peptide was cleaved from the resin with the use of DCM/TFE/AcOH (8:1:1, v/v/v) mixture (45 min). Then the peptide solution was filtered and solvents were evaporated under reduced pressure. The crude product was dissolved in acetonitrile/water (6:4, v/v) and lyophilized to obtain Ac-*L*-Phe(3,4-Cl<sub>2</sub>)-*L*-hArg(Boc)<sub>2</sub>-OH as a white powder. In the next step Ac-*L*-Phe(3,4-Cl<sub>2</sub>)-*L*-hArg(Boc)<sub>2</sub>-OH (1.1 eq) and HATU (1.1 eq) were dissolved in DMF, followed by the addition of collidine (2.2 eq). After 1 min of peptide activation the mixture was added into flask containing crude NH<sub>2</sub>-*L*-Leu-CMK (1 eq). The coupling reaction was carried out for 45 min (HPLC analysis). Next, DMF was removed under reduced pressure (oil pump) and the 25% of TFA in DCM added in order to remove Boc groups from hArg (1 hour). Finally, the product (Ac-*L*-Phe(3,4-Cl<sub>2</sub>)-*L*-hArg-*L*-Leu-CH<sub>2</sub>Cl, **Leu-CMK**) was purified on semipreparative HPLC and lyophilized. The second inhibitor, Ac-*L*-Phe(3,4-Cl<sub>2</sub>)-*L*-hArg-*L*-2-Aoc-CH<sub>2</sub>Cl, **Aoc-CMK** was synthesized in a similar manner.

Both inhibitors were purified by HPLC on a Waters M600 solvent delivery module with a Waters M2489 detector system using a semi-preparative Waters Spherisorb S100DS2 column (particle size 10 µm). The solvent composition was as follows: phase A (water/0.1% TFA) and phase B (ACN/0.1% TFA). The

purity of these compounds was confirmed by analytical HPLC system using a Waters Spherisorb S50DS2 column (particle size 5  $\mu\text{m}$ ).

Characterization of **Leu-CMK**:

**RP-HPLC** (gradient: 100% phase A  $\rightarrow$  100% phase B in 40 min):  $t_R = 21.289$  min

**HRMS ESI** calcd. for  $\text{C}_{25}\text{H}_{37}\text{Cl}_3\text{N}_6\text{O}_4$   $[\text{M}+\text{H}]^+$ : 591.2020, found 591.2040.

Characterization of **Aoc-CMK**:

**RP-HPLC** (gradient: 100% phase A  $\rightarrow$  100% phase B in 40 min):  $t_R = 21.971$  min

**HRMS ESI** calcd. for  $\text{C}_{27}\text{H}_{41}\text{Cl}_3\text{N}_6\text{O}_4$   $[\text{M}+\text{H}]^+$ : 619.2333, found 619.2330.



## 5. HPLC Chromatograms

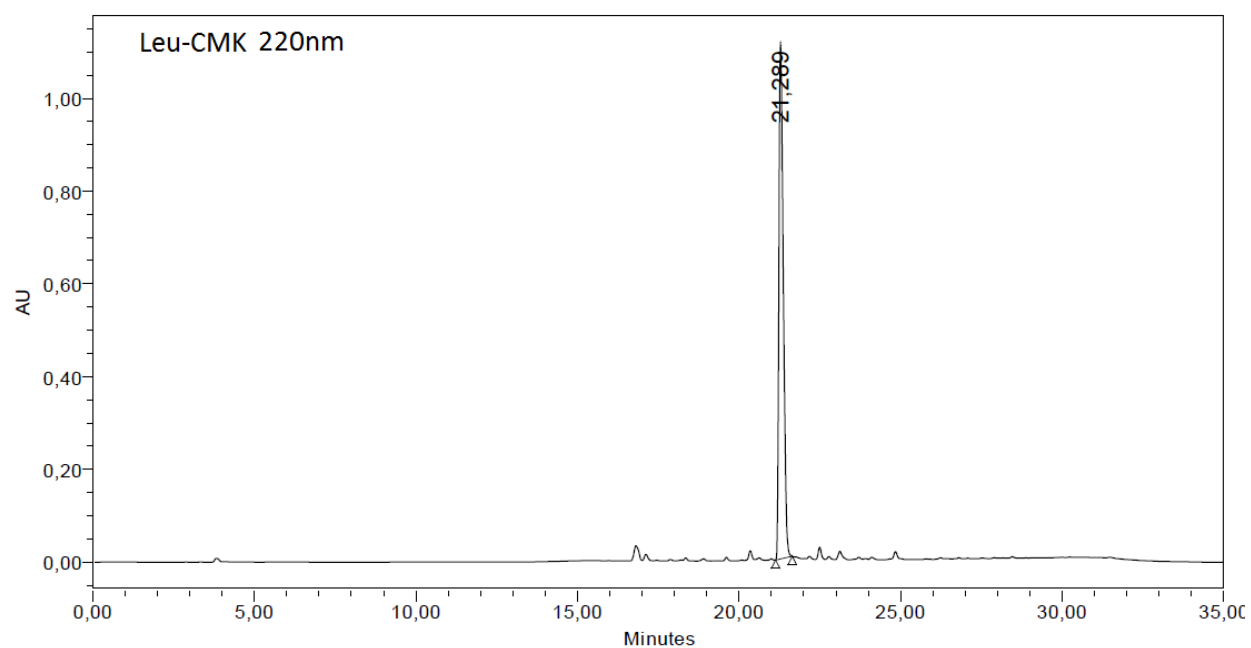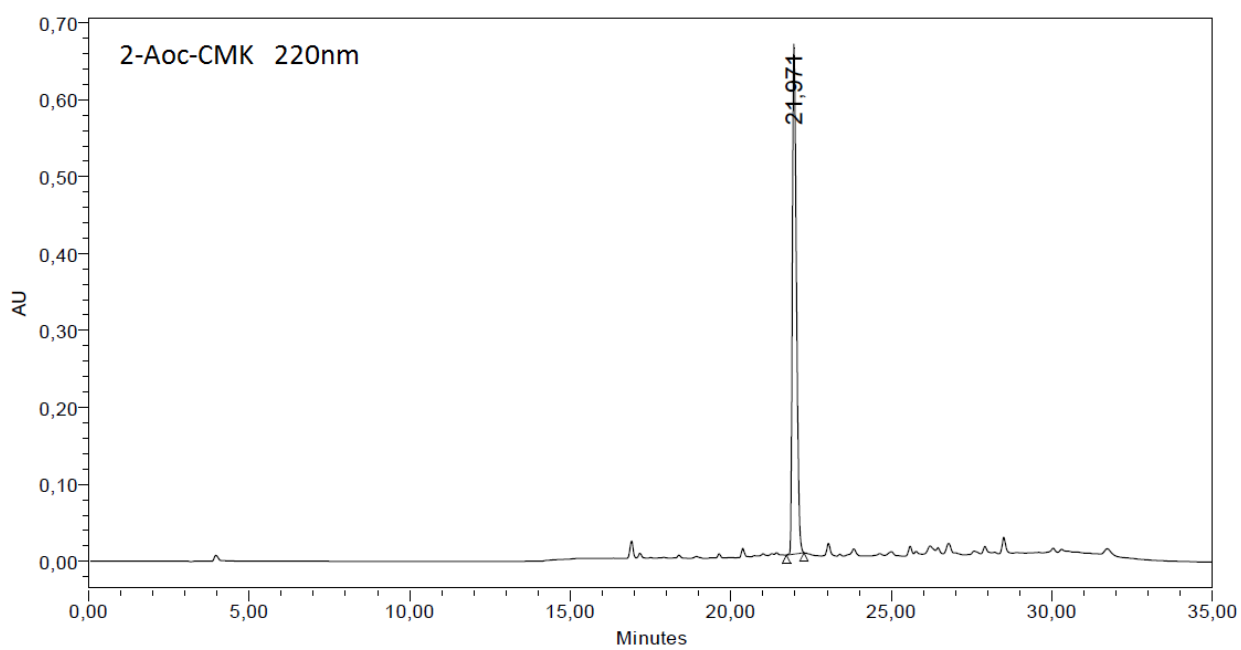

## 6. MS Spectra

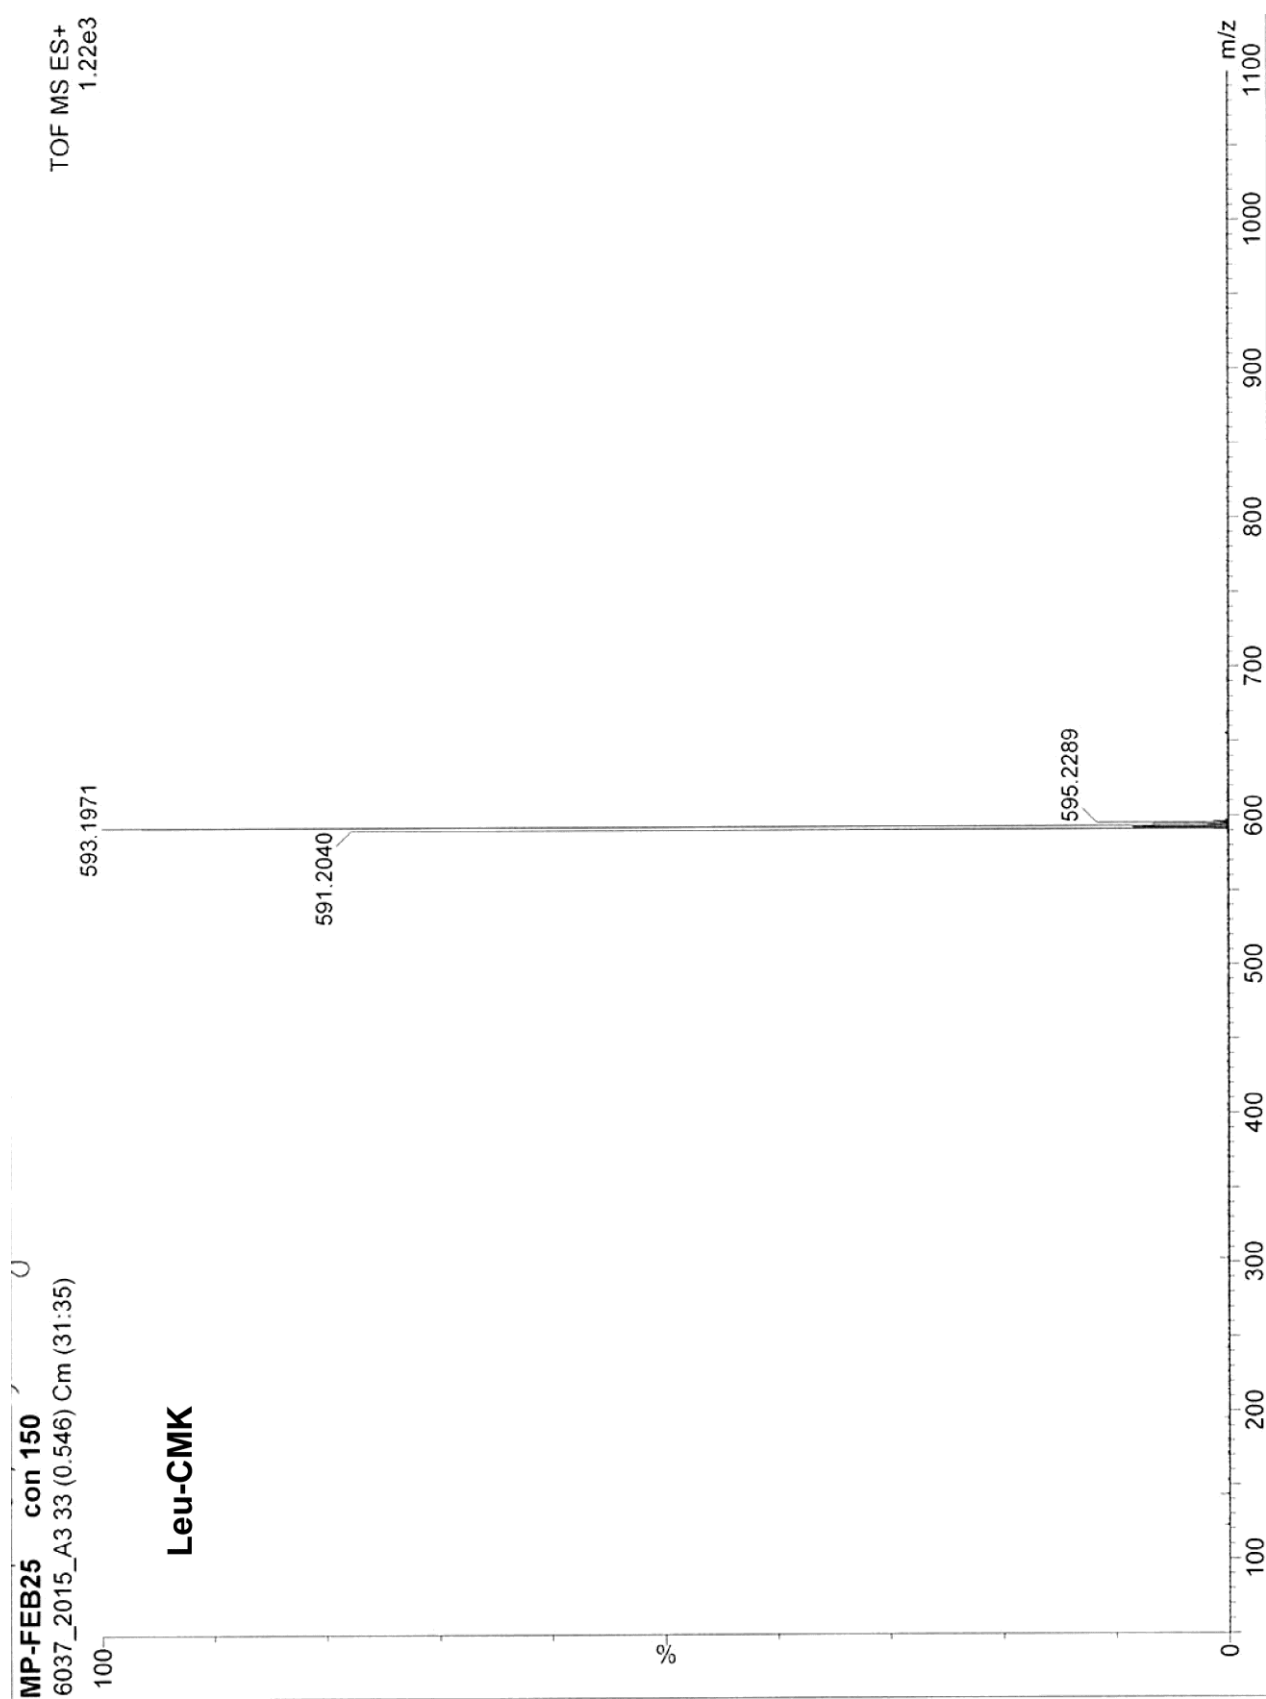

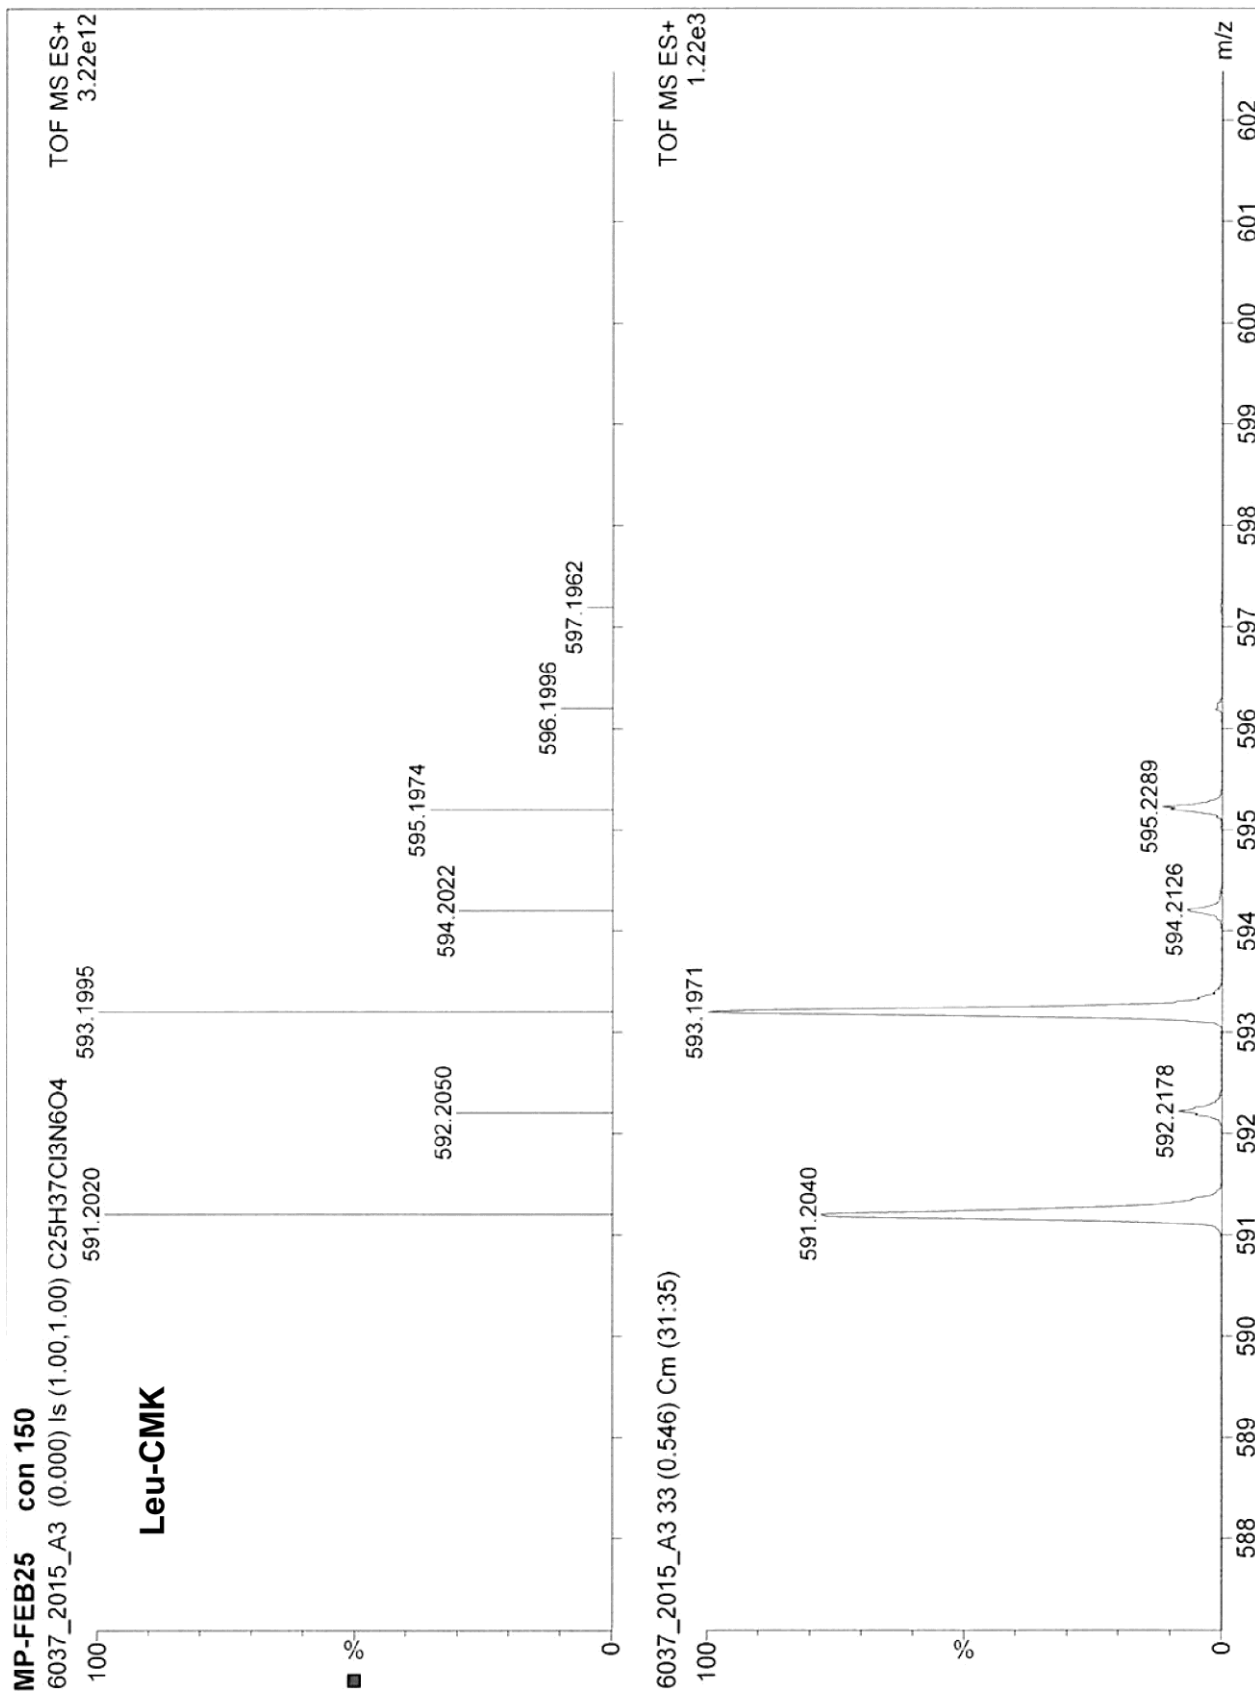

MP-FEB20 con 150  
6038\_2015\_A2 21 (0.342) Cm (12:24)

Aoc-CMK

TOF MS ES+  
2.00e3

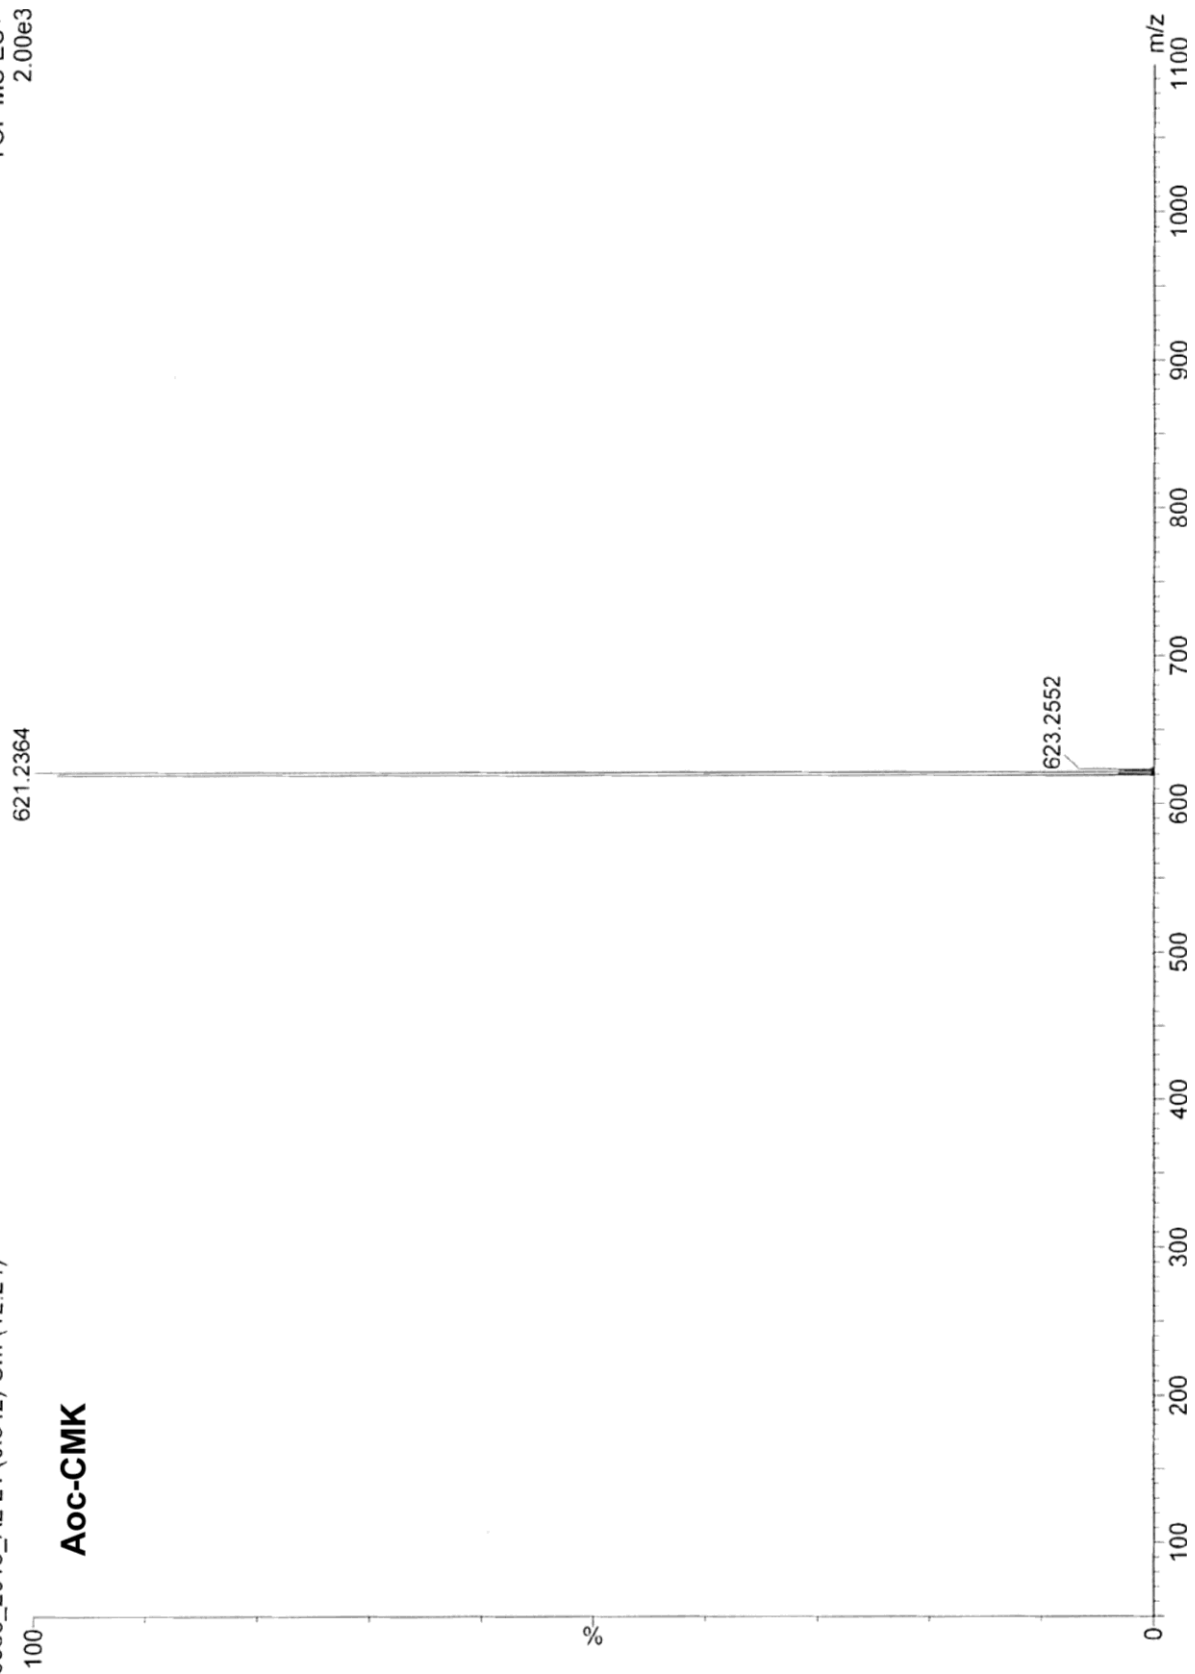

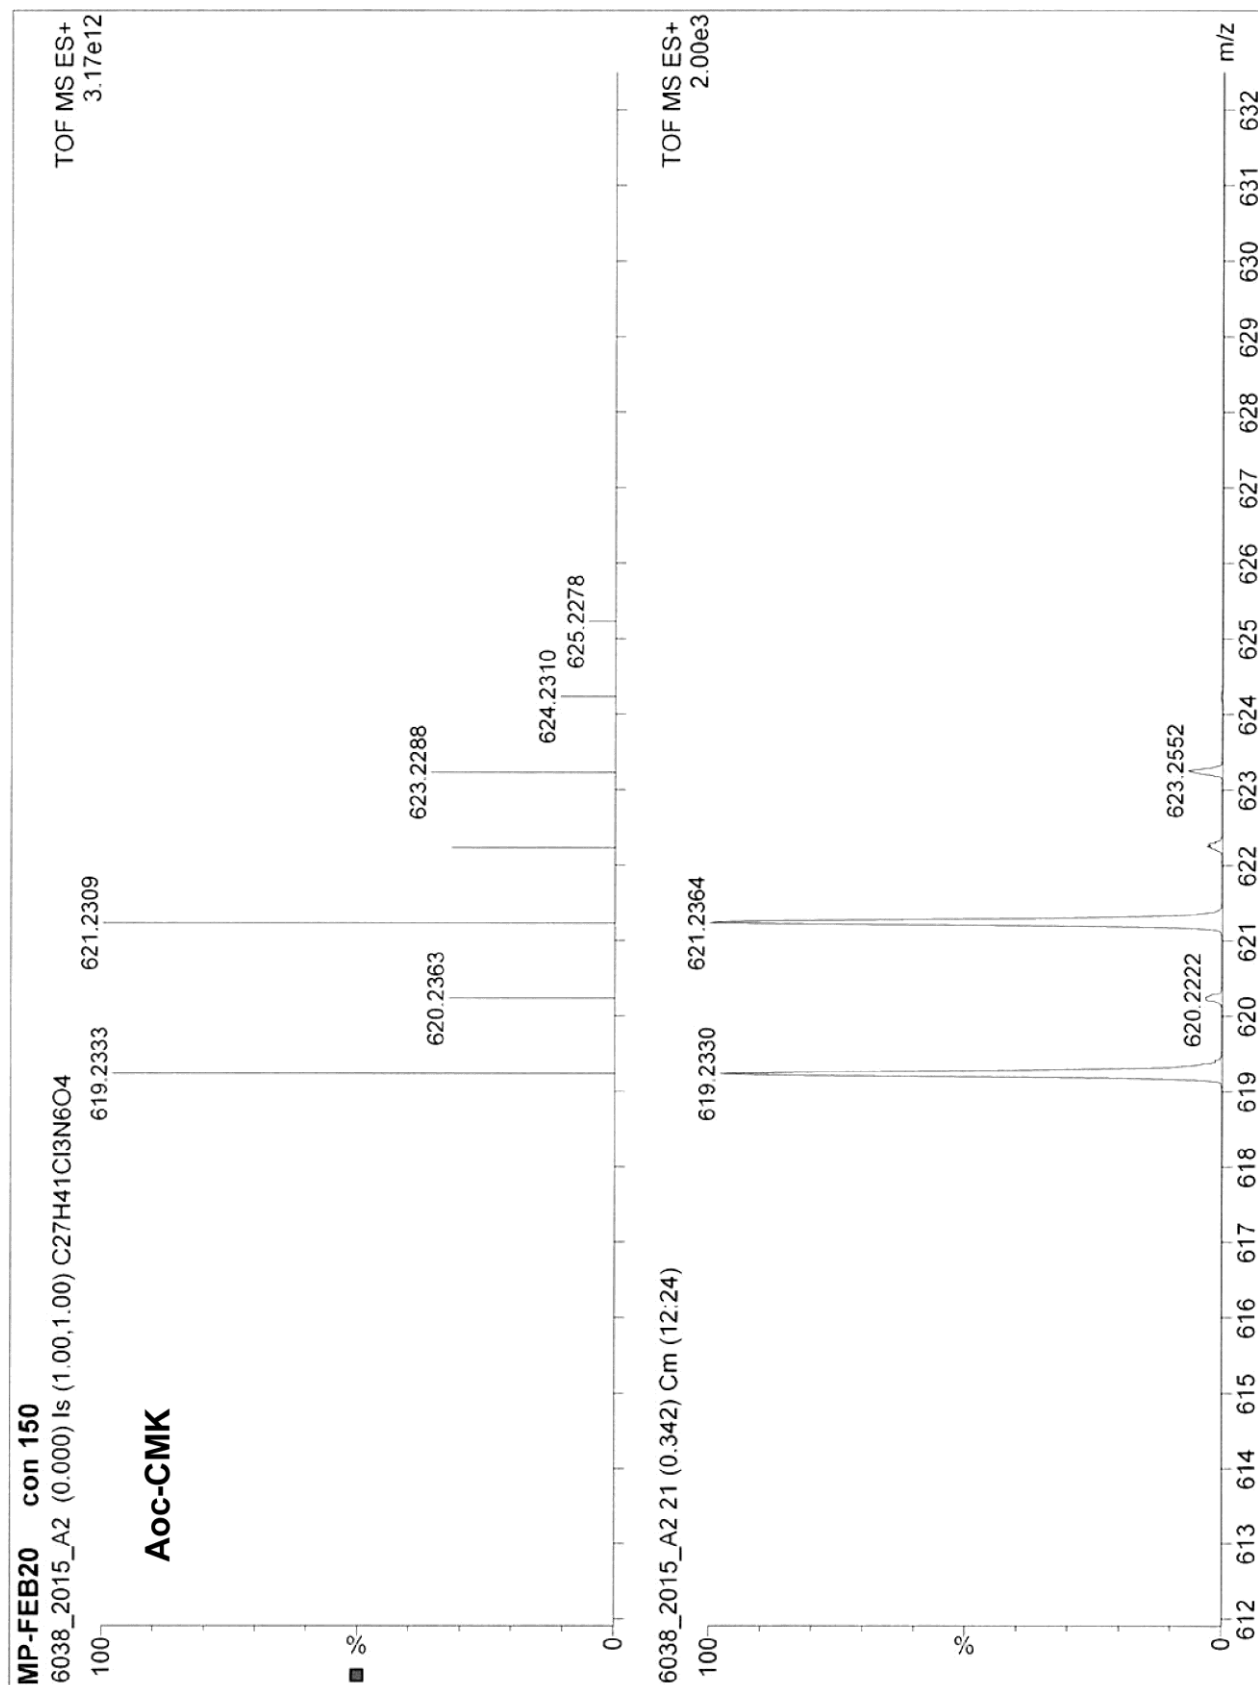

## 7. Supplementary references

1. The PyMOL Molecular Graphics System, Version 1.3 Schrodinger, LLC.
2. E. Zeiler, A. List, F. Alte, M. Gersch, R. Wachtel, M. Poreba, M. Drag, M. Groll and S. A. Sieber, *Proc. Natl. Acad. Sci. U. S. A.*, 2013, **110**, 11302-11307.
3. M. Gersch, A. List, M. Groll and S. A. Sieber, *J. Biol. Chem.*, 2012, **287**, 9484-9494.
4. M. Dahmen, M. T. Vielberg, M. Groll and S. A. Sieber, *Angew. Chem., Int. Ed. Engl.*, 2015, **54**, 3598-3602.
5. M. Gersch, K. Famulla, M. Dahmen, C. Gobl, I. Malik, K. Richter, V. S. Korotkov, P. Sass, H. Rubsamen-Schaeff, T. Madl, H. Brotz-Oesterhelt and S. A. Sieber, *Nat. Commun.*, 2015, **6**, 6320.
6. M. Kanemori, K. Nishihara, H. Yanagi and T. Yura, *J. Bacteriol.*, 1997, **179**, 7219-7225.
7. M. Gersch, M. Stahl, M. Poreba, M. Dahmen, A. Dziedzic, M. Drag and S. A. Sieber, *ACS Chem. Biol.*, 2016, **11**, 389-399.
8. D. Kato, K. M. Boatright, A. B. Berger, T. Nazif, G. Blum, C. Ryan, K. A. Chehade, G. S. Salvesen and M. Bogoy, *Nat. Chem. Biol.*, 2005, **1**, 33-38.
